1 **Title:** Landmark navigation in a mantis shrimp

2 **Authors:** Rickesh N. Patel <sup>1\*</sup>, Thomas W. Cronin <sup>1</sup>

3 **Affiliations:** <sup>1</sup> The University of Maryland, Baltimore County.

4 UMBC Department of Biological Sciences, 1000 Hilltop Circle, Baltimore, Maryland 21250

5 \*Correspondence to: rickp1@umbc.edu

6

7 **Summary:**

8 Mantis shrimp are predatory crustaceans that commonly occupy burrows in shallow,  
9 tropical waters worldwide. Most of these animals inhabit structurally complex, benthic  
10 environments where many potential landmarks are available. Mantis shrimp of the species  
11 *Neogonodactylus oerstedii* return to their burrows between foraging excursions using path  
12 integration, a vector-based navigational strategy that is prone to accumulated error. Here we  
13 show that *N. oerstedii* can navigate using landmarks in parallel with their path integration  
14 system, offsetting error generated when navigating using solely path integration. We also report  
15 that when the path integration and landmark navigation systems are placed in conflict, *N.*  
16 *oerstedii* will orient using either system or even switch systems enroute. How they make the  
17 decision to trust one navigational system over another is unclear. These findings add to our  
18 understanding of the refined navigational toolkit *N. oerstedii* relies upon to efficiently navigate  
19 back to its burrow, complementing its robust, yet error prone, path integration system with  
20 landmark guidance.

21

22 **Key Words:** navigation, path integration, landmark navigation, visual guidance, mantis shrimp,  
23 stomatopod, homing, marine biology

24

25 **Introduction:**

26 Stomatopods, better known as mantis shrimp, are benthic crustaceans renowned for their  
27 ballistic strikes and complex visual systems. As adults, most mantis shrimp species reside in  
28 shallow tropical marine waters, environments that are often structurally varied and therefore  
29 contain many potential visual landmarks [1]. In these environments, mantis shrimp typically  
30 occupy small holes or crevices for use as burrows, where they reside concealed for most of the  
31 day. During foraging, many stomatopod species leave the safety of their burrows for extended  
32 excursions, where they become vulnerable to predation [2-5]. Returning to the burrow efficiently  
33 is critical to minimize predation risk and to also reduce the chance that the vacated burrow will  
34 be claimed by another animal.

35 Mantis shrimp of the species *Neogonodactylus oerstedii* employ path integration to  
36 efficiently navigate back to their burrows between foraging bouts [5]. During path integration, an  
37 animal monitors the distances it travels in various directions from a reference point (usually  
38 home) using a biological compass and odometer. From this information, a home vector (the most  
39 direct path back to the reference point) is continuously calculated, allowing the animal to return  
40 to its original location [6-8]. As animals update their home vectors during excursions, small  
41 errors in odometric and orientation measurements are made. Over the course of an animal's  
42 travel, these small errors accumulate in its path integrator. Therefore, with longer outward paths,  
43 increased errors of home vectors are expected [7, 9]. Path integration using idiothetic cues (those

44 informed by stimuli anchored internal to the body) are particularly prone to accumulated error.  
45 As theory suggests, path integration in *N. oerstedii* is prone to this accumulated error [10]. To  
46 reduce this error, many path-integrators use landmarks to accurately pinpoint their goal [9, 11-  
47 14]. We hypothesized that in addition to path integration, *N. oerstedii* uses landmarks when  
48 available during navigation. The benthic habitats *N. oerstedii* occupy are structurally complex  
49 with an abundance of sponges, coral, rock, and seagrass to serve as potential visual landmarks  
50 (Fig. 1). Using landmarks during navigation would allow *N. oerstedii* to correct for error  
51 accumulated while path-integrating during foraging paths away from the burrow.

52

## 53 **Results:**

### 54 ***Neogonodactylus oerstedii* uses landmarks during navigation**

55 We placed *N. oerstedii* individuals in relatively featureless circular arenas filled with  
56 sand and sea water in a glass-roofed greenhouse. Vertical burrows were buried in the sand so that  
57 they were hidden from view when experimental animals were away. Snail shells stuffed with  
58 small pieces of shrimp were placed at one of two fixed locations approximately 70 cm from the  
59 location of the burrow in the arena (Fig. 2A). Foraging paths to and from the location of the food  
60 were video recorded from above.

61 As described by Patel and Cronin (2020a,b) [5,10], we observed that animals would make  
62 tortuous paths away from the burrow until they located the food placed in the arena. After  
63 animals located the food, they would usually execute a fairly direct home vector towards the  
64 burrow. If the burrow was not found using the home vector, animals would initiate a stereotyped  
65 search behavior (Fig. 2C and Extended Data Video 1).

66 To determine if *N. oerstedii* use landmarks during homeward navigation when available,  
67 a 2-cm diameter, 8-cm tall vertical cylinder with alternating 1-cm thick horizontal black and  
68 white stripes was placed adjacent to the burrow to serve as a landmark. Stripe cycles of the  
69 landmark would appear to span approximately 0.8 cycles/degree at the location of the food,  
70 approximately twice the visual resolving limit of *Gonodactylus chiragra* [15], a closely related  
71 mantis shrimp that can be slightly larger than *N. oerstedii*. Trials with the landmark present were  
72 compared to the results of previous experiments in which the landmark was absent [5].

73 Return trips in the presence of the landmark were more direct than trips in the landmark's  
74 absence ( $P < 0.05$ ; Fig. 2C-D and 3, and Extended Data Videos 1 and 2), supporting the  
75 hypothesis that *N. oerstedii* uses landmarks during navigation. This was primarily due to the  
76 virtual elimination of stereotyped search behaviors at the ends of homeward paths in the presence  
77 of the landmark. Instead, short directed searches for the burrow around the landmark were  
78 observed. Return trips were initially oriented similarly between the two groups (Groups were  
79 oriented:  $P < 0.001$  for both groups; Orientations were not significantly different between  
80 groups:  $P > 0.5$ ; All statistical outcomes are presented in Tables 1-3). However, during trials in  
81 the presence of the landmark, individuals appeared to correct for their initial homeward error  
82 over the course of the homeward path ( $P < 0.05$ ), in contrast to what we observed in the absence  
83 of the landmark ( $P > 0.5$ ; Fig. 2D-F). These results indicate that in the presence of a landmark, *N.*  
84 *oerstedii* uses both path integration and landmark navigation to navigate back to its burrow.

85

86 **Mantis shrimp exhibit varied homeward paths when landmark navigation and path**  
87 **integration are placed in conflict**

88           In light of the above results, we were interested in the confidence *N. oerstedii* places in its  
89 landmark navigation system when it is in conflict with its path integrator. In order to create this  
90 situation, homeward paths were observed when a landmark adjacent to the burrow was displaced  
91 to a new location in the arena while experimental individuals were away foraging. The landmark  
92 remained at roughly the same distance from the food location both before and after displacement.  
93 If *N. oerstedii* navigates using landmarks and trusts a landmark's location over the location  
94 designated by its path integrator when homing, animals should orient towards the displaced  
95 landmark rather than the burrow's location (Fig. 2B).

96           Homeward paths were less direct ( $P < 0.05$ ; Fig. 3) and were differently oriented ( $P <$   
97  $0.05$ ; Fig. 2D-F) when landmarks were displaced compared to when they were left in place,  
98 further supporting the hypothesis that *N. oerstedii* navigate using landmarks. Some individuals  
99 oriented towards the displaced landmark while others ignored the displaced landmark, orienting  
100 towards the burrow (Fig. 2C and Extended Data Videos 3 and 4). Several individuals initially  
101 oriented towards the displaced landmark, but broke away from their initial trajectories during  
102 their homeward paths, orienting towards the burrow instead (Fig. 2D). Overall, however,  
103 differences observed between initial path orientations and the orientations of homeward paths at  
104 the end of the home vector were not statistically significant when the landmark was displaced ( $P$   
105  $= 0.36$ ; Fig. 2E-F). One individual initially oriented its homeward path towards the landmark,  
106 only to turn around and return to the food location before adopting a revised homeward path  
107 oriented towards the burrow (Fig. 2D). These observations suggest that the path integrator of *N.*  
108 *oerstedii* is continually updated during foraging, even after homeward paths are initiated.

109           As just described, when landmarks were displaced some animals adopted paths initially  
110 oriented towards the displaced landmark while others ignored the displaced landmark

111 completely, orienting towards the burrow. These results demonstrate that *N. oerstedii* must make  
112 decisions when the navigational strategies it relies on are in conflict and raise the question of  
113 how these decisions are made.

114         Due to errors inherent in path integration, *N. oerstedii* exhibit growing home vector errors  
115 with increased outward path lengths [10]. When the landmark was displaced, individuals may  
116 have evaluated this accumulated error during foraging, choosing to trust the position of the  
117 landmark when the accumulated error of the path integrator was high (i.e. confidence in the path  
118 integrator was low). However, we found that the orientations of homeward paths during  
119 landmark displacement experiments were not significantly correlated with the outward path  
120 lengths from the burrow to the food location ( $P = 0.16$ ; Fig. 4A); nonetheless, the effect size of  
121 this relationship was fairly strong ( $r = -0.48$ ), suggesting this hypothesis should not be  
122 completely discounted.

123         Cataglyphid desert ants are model terrestrial species for studying navigation using path  
124 integration and visual landmarks. In experiments with these ants, when their path integrators are  
125 placed conflict with their surrounding landmark panorama, displaced desert ants will orient  
126 toward either the location indicated by their path integrator or toward a local landmark array  
127 depending on their distance from their nest, not on the error accumulated in their path  
128 integrators. These ants will orient using their home vectors, ignoring local landmarks, when  
129 displaced from at a distance greater than three meters from their nest; however, they will orient  
130 using the local landmark array when displaced from near the nest. When displaced from a  
131 distance of one meter from their nest, desert ants will orient with a mean vector not clearly  
132 directed at either their home vectors derived from path integration or the local landmark  
133 panorama, but somewhere in between [16]. Interestingly, orientation results of the desert ants

134 displaced from roughly one meter from the nest are similar to those of *N. oerstedii* during the  
135 landmark displacement experiments described above. Stomatopods in those experiments were  
136 around 0.7 m from their burrows when initiating their homeward paths (Fig. 3E). These  
137 observations suggest that a cue integration mechanism resembling that employed by desert ants  
138 may also be present in mantis shrimp.

139         As an alternative hypothesis to account for the variation observed in homeward paths  
140 during experiments when the landmark was displaced, the deviation between the home vector  
141 and the landmark's perceived position may have been at a preference threshold for either of the  
142 two navigation systems. For example, if the landmark was displaced further away from the  
143 burrow, the majority of animals may have trusted their home vector, while if the landmark was  
144 not moved as far from the burrow, the animals may have been more likely to trust the landmark's  
145 position. However, when homeward path orientations during landmark displacement  
146 experiments were compared to the distance of landmark displacement along the track during  
147 those trials, no correlation was observed ( $P=0.92$ ,  $r = -0.04$ ; Fig. 4B). This suggests that the  
148 degree of landmark displacement did not influence the decision to orient toward the home vector  
149 or the displaced landmark during these trials.

150         Finally, we hypothesized that animals that may have observed the landmark's  
151 displacement were more likely to disregard its location than those that may not have noticed  
152 displacement of the landmark. To investigate this hypothesis, we measured the orientations of all  
153 animals' body axes with respect to the landmark while it was displaced, sampled at a rate of 0.2  
154 seconds. We compared the means of these body axis orientations to the orientations of  
155 homeward paths and found no correlation ( $P = 0.604$ ,  $r = 0.19$ ; Fig. 4C). This suggests that either  
156 animals did not notice the landmark's displacement or that observing the landmark's

157 displacement did not influence an animal's decision to determine the burrow's location by using  
158 the displaced landmark's position or by using its home vector.

159

## 160 **Discussion:**

161 Our results demonstrate that *Neogonodactylus oerstedii* uses landmark navigation  
162 together with path integration while navigating back to its burrow while foraging. Landmarks are  
163 reliable references which can be used to correct for error accumulated by path integration; this is  
164 especially important during idiothetic path integration, which *N. oerstedii* uses when allothetic  
165 cues become unreliable [5].

166 Landmarks were used in a very basic situation during our experiments— as a beacon to  
167 home towards. Many other questions about how landmarks may be used by mantis shrimp arise  
168 from this work: Can mantis shrimp estimate the relative position of a goal to multiple  
169 landmarks? Do stomatopods use a snapshot mechanism like that employed by some insects to  
170 learn landmark arrays [13,17]? Do they possess cognitive maps akin to those thought to exist in  
171 mammals [18]? Do mantis shrimp learn to recognize landmarks encountered during foraging  
172 routes, exhibiting “trapline foraging”? Further, mantis shrimp are famed for possessing complex  
173 color vision, linear polarization vision in two spectral channels, and circular polarization vision  
174 [19]. Besides spatial vision alone, do stomatopods use these visual channels to identify  
175 landmarks? If so, how?

176 Mantis shrimp occupy a wide variety of marine habitats and depths, from structurally  
177 complex reefs to nearly featureless mud flats. Stomatopod species that occupy landmark-rich  
178 environments may weigh the importance of landmarks more heavily during navigation than



179 stomatopods which occupy benthic environments relatively void of landmarks. Further, visual  
180 information rapidly attenuates with distance underwater due to extreme scattering of light in  
181 water. Therefore, the relative importance of landmark navigation over path integration may differ  
182 for mantis shrimp species occupying waters of different depths and turbidities.

183       Taken together with our previous work on mantis shrimp navigation [5, 10], this work  
184 offers an opportunity to study the neural basis of navigation, learning, memory, and decision  
185 making in stomatopods. Mushroom bodies, centers for arthropod learning and memory, are  
186 thought to play a prominent role in landmark learning in insects [20-23]. Prominent  
187 hemiellipsoid bodies, homologues of insect mushroom bodies, exist in stomatopod eyestalks  
188 [24]. As in insects, these neuropils may be crucial for navigation and landmark learning in  
189 mantis shrimp. A separate brain region, the central complex, plays a role in landmark orientation  
190 in *Drosophila melanogaster*. Here, landmark orientation is neurally based in the ellipsoid body  
191 of the central complex [25]. Stomatopods themselves possess a highly developed central  
192 complex composed of a collection of neuropils anatomically very similar to those found in  
193 insects [26]. Investigation of the function of stomatopod brain regions in light of our work may  
194 have implications for the evolutionary origins of navigational strategies and the neural  
195 architecture of the brain within the ancient Pancrustacean clade, a taxon which includes all  
196 insects and crustaceans [27], as well as in other arthropods.

197       In summary, *N. oerstedii* possesses a robust navigational toolkit on which it relies to  
198 efficiently navigate back to its burrow. First, *N. oerstedii* relies on path integration using multiple  
199 redundant compass cues to navigate back to its home [5]. If path integration does not lead *N.*  
200 *oerstedii* directly to its burrow, it relies on a stereotyped search behavior which is scaled to the  
201 amount of error it accumulates during its outbound foraging path to locate its nearby lost target

202 [10]. Finally, the stomatopod will use landmarks, if available, to quickly pinpoint its target,  
203 offsetting error accumulated during path integration.

204

205 **Acknowledgements:** We thank N.S. Roberts and J. Park for research assistance.

206 **Funding:** This work was supported by grants from the Air Force Office of Scientific Research  
207 under grant number FA9550-18-1-0278 and the University of Maryland Baltimore County.

208 **Author Contributions:** R.N.P. designed and conducted all research, analyzed all data, and  
209 prepared the manuscript. T.W.C. provided guidance and research support.

210 **Competing Interests:** The authors declare no competing financial interests.

211 **Data and Materials Availability:** The data that support the findings of this study are available  
212 from the corresponding author upon reasonable request. Correspondence and requests for  
213 materials should be addressed to R.N.P. (e-mail: [rickpl@umbc.edu](mailto:rnickpl@umbc.edu)).

214

215

216

217

218

219

220

221 **Figures:**

222

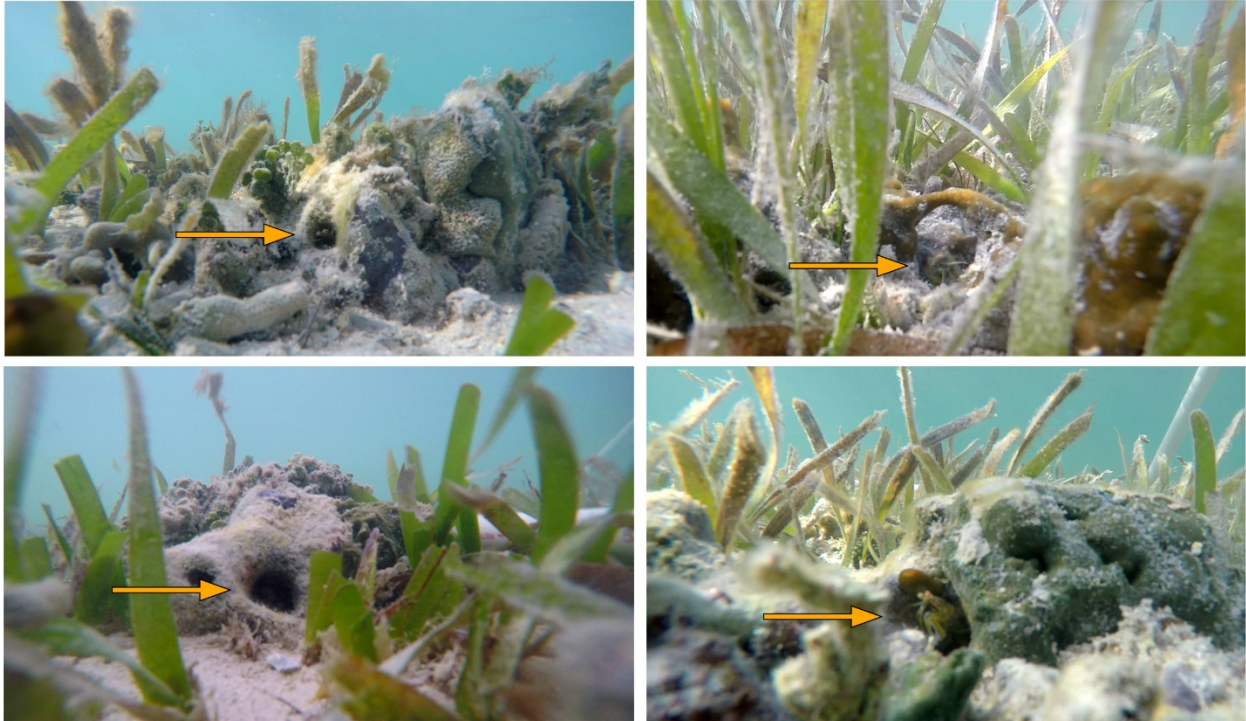

223

224 **Figure 1. *Neogonodactylus oerstedii* inhabits shallow waters that offer an abundance of**  
225 **potential landmarks.** Burrows are indicated by orange arrows. Note the abundance of potential  
226 landmarks, including marine vegetation, sponges, coral fragments, and rock rubble, available in  
227 the scenes. Stomatopods can be seen in their burrows in all except the bottom left panel, in which  
228 the photograph was taken when the animal had left its home.

229

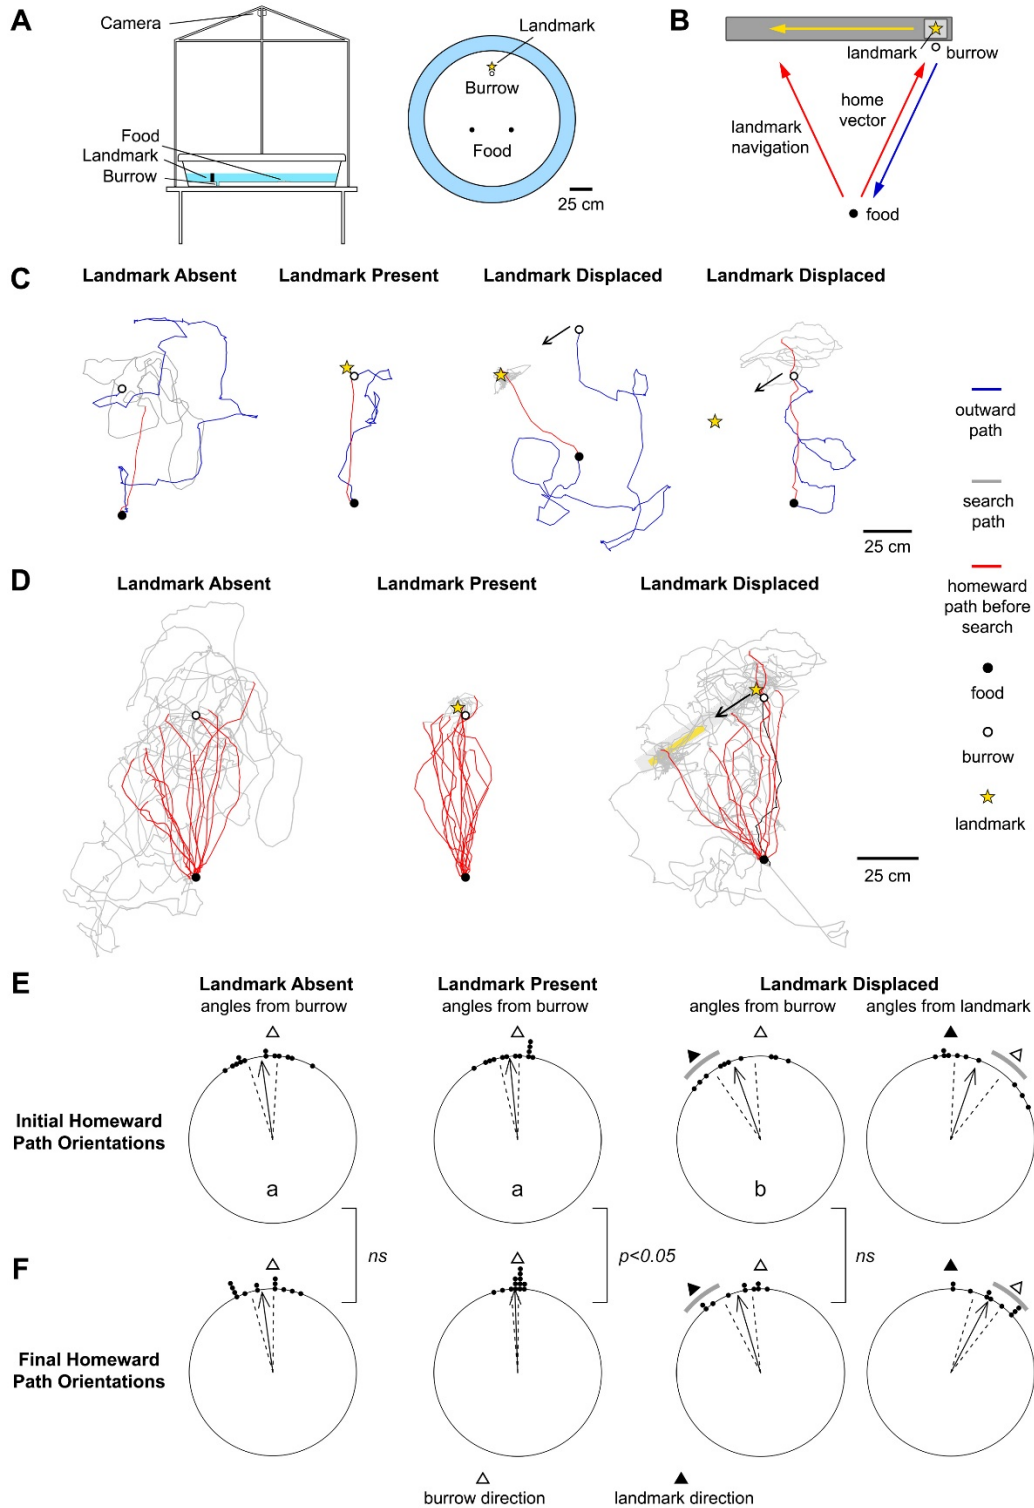

230

231 **Figure 2. *Neogonodactylus oerstedii* uses a landmark to navigate back to its burrow while**

232 **foraging. (A) Navigation arenas. Each arena was 150 cm diameter. A vertical burrow was set**

233 into the base of the arena 30 cm from the edge of the pool so it was invisible at range (empty  
234 circle). A landmark was placed adjacent to the burrow during some experiments (gold-filled  
235 star). Food was placed in one of two locations near the center of the pool (filled circles).  
236 Behaviors were video recorded from above. **(B)** Landmark displacement experimental design.  
237 Homeward paths were observed when a landmark adjacent to the burrow was displaced to a new  
238 location in the arena while experimental individuals were away foraging. **(C)** Examples of  
239 foraging paths from and to the burrow during the three experimental conditions. Blue lines  
240 represent outward paths from the burrow while red lines represent homeward paths before search  
241 behaviors were initiated. Grey lines represent homeward paths after search behaviors were  
242 initiated. Empty and filled circles represent the location of the burrow and food, respectively.  
243 Gold-filled stars represent the location of the landmark. Arrows represent paths of landmark  
244 displacements. **(D)** Data from all homeward paths. Lines and filled circles represent the same as  
245 in (C). The grey rectangle represents the track along which the landmark was displaced. The gold  
246 rectangle marks the range of locations to which the landmark was displaced during landmark  
247 displacement trials. The black tracing in the “landmark displaced” group marks the homeward  
248 path of an individual on its second run which, after orienting its initial homeward path towards  
249 the displaced landmark (in red), it returned to the food location and oriented towards the burrow  
250 (in black). **(E)** Orientations of homeward paths at one-third the beeline distance from the location  
251 of the food to the burrow (initial orientations). Each point along the circumference of the circular  
252 plot represents the orientation of the homeward path of one individual with respect to either the  
253 actual position of the burrow (empty triangle) or displaced landmark’s position (filled triangle).  
254 Grey arcs in the “Landmark Displaced” orientation plots represent the range of the directions of  
255 the either the displaced landmark or the burrow from at the location of the food. Arrows in each

256 plot represent mean vectors, where arrow angles represent vector angles and arrow lengths  
257 represents the strength of orientation ( $\bar{R}$ ). Dashed lines represent 95% confidence intervals.  
258 Different letters within orientation plots denote a significant difference between groups ( $p < 0.05$ ).  
259 “Landmark Absent” data were obtained from Patel and Cronin (2020a) [5]. **(F)** Homeward path  
260 orientations of groups same as in (E) measured immediately before search behaviors were  
261 initiated (final orientations).  
262

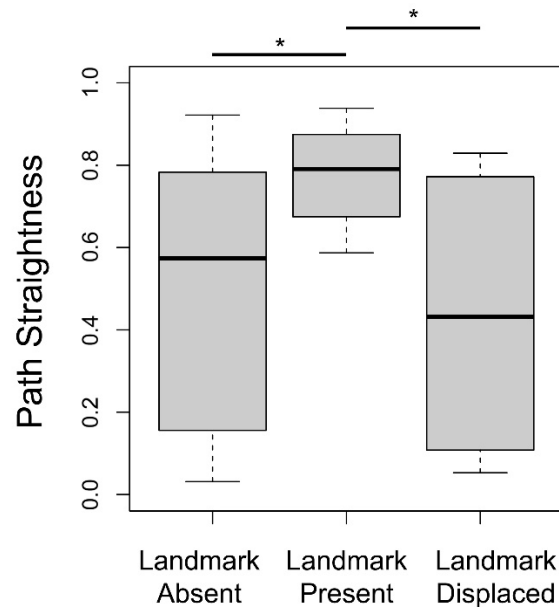

263  
264 **Figure 3. Homeward paths were more direct when a fixed landmark was present during**  
265 **navigation than when the landmark was absent or displaced to a new location in the arena**  
266 **during foraging.** Straightness of homeward paths from the location of food to the burrow during  
267 trials when the landmark was present, absent, and displaced. Larger path straightness values  
268 indicate straighter paths with a value of one being a completely straight path from the food  
269 location to the burrow (a beeline path). Bars represent medians, boxes indicate lower and upper  
270 quartiles, and whiskers show sample minima and maxima. Asterisks indicate significant

271 differences in path straightness between groups ( $P \leq 0.05$ ; Landmark Absent:  $n = 13$ , Landmark  
272 Present:  $n = 13$ , Landmark Displaced:  $n = 10$ ).

273

274

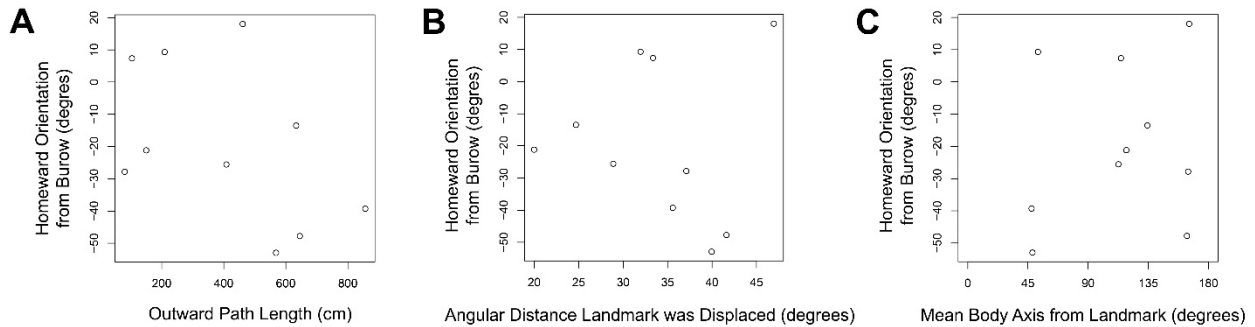

275

276 **Figure 4. It is unclear why *N. oerstedii* chose to trust either the landmark or the home**  
277 **vector while navigating during landmark displacement experiments. (A)** The orientations of  
278 homeward paths when the landmark was displaced was not significantly correlated with the  
279 length of outward paths from the burrow to the location of food ( $P = 0.16$ ,  $n = 10$ ,  $r = -0.48$ ). **(B)**  
280 The orientations of homeward paths when the landmark was displaced was not correlated with  
281 the angular distance of landmark displacement along the track when viewed from the location of  
282 the food ( $P = 0.92$ ,  $n = 10$ ,  $r = -0.04$ ). **(C)** Homeward path orientations were not correlated with  
283 body axis orientations of animals with respect to the landmark during its displacement ( $P =$   
284  $0.604$ ,  $n = 10$ ,  $r = 0.19$ ). Each point represents the mean body axis orientation of an individual  
285 with respect to the landmark measured at a sampling rate of 0.2 seconds during the landmark's  
286 displacement.

287

288

289



290 **Tables:**

291

292 **Table 1: Statistical outcomes of orientation analyses for all experimental groups.**

293 Orientations of homeward paths were measured relative to the burrow at one-third the beeline  
 294 distance from the location of the food to the burrow (initial orientations) and were measured  
 295 immediately before search behaviors were initiated (final orientations). Rayleigh tests of  
 296 uniformity with Holm-Bonferroni multiple testing corrections were used to determine if groups  
 297 were oriented. Data from this table can be viewed in Figure 2E and F.

| Experiment                                                      | P-value (uncorrected) | Holm-Bonferroni (corrected P-value) | n  | $\bar{R}$ | Mean Vector Orientation $\pm$ S.E.M. |
|-----------------------------------------------------------------|-----------------------|-------------------------------------|----|-----------|--------------------------------------|
| Landmark Absent (Initial)                                       | <0.0001               | <0.001                              | 13 | 0.949     | 354.4° $\pm$ 3.76°                   |
| Landmark Present (Initial)                                      | <0.0001               | <0.001                              | 13 | 0.974     | 352.2° $\pm$ 5.36°                   |
| Landmark Displaced (with respect to burrow position; Initial)   | <0.0001               | <0.001                              | 10 | 0.920     | 340.54° $\pm$ 7.76°                  |
| Landmark Displaced (with respect to landmark position; Initial) | <0.0001               | <0.001                              | 10 | 0.894     | 18.79° $\pm$ 8.93°                   |
| Landmark Absent (Final)                                         | <0.0001               | <0.001                              | 13 | 0.966     | 352.32° $\pm$ 4.31°                  |
| Landmark Present (Final)                                        | <0.0001               | <0.001                              | 13 | 0.996     | 358.03° $\pm$ 1.47°                  |
| Landmark Displaced (with respect to burrow position; Final)     | <0.0001               | <0.001                              | 10 | 0.960     | 343.73° $\pm$ 5.44°                  |
| Landmark Displaced (with respect to landmark position; Final)   | <0.0001               | <0.001                              | 10 | 0.956     | 27.54° $\pm$ 5.74°                   |

298

299

300 **Table 2: Summary of homogeneity of means circular statistical tests for orientation data.**

301 Comparisons of orientation groups in rows without an asterisk were analyzed using a Watson-  
 302 Wheeler Test of Homogeneity of Means (test statistic is F). Comparisons of groups in rows with  
 303 an asterisk (\*) were analyzed using a non-parametric Watson's Two-Sample Test of



304 Homogeneity (test statistic is  $U^2$ ) since they did not adhere to the assumptions of a Watson-  
305 Wheeler Test. A P-value of less than 0.05 indicates a significant difference between groups. Data  
306 from this table can be viewed in Figure 2E and F.

| Experiment                                                                          | P-value | Holm-Bonferroni | Test Statistic |
|-------------------------------------------------------------------------------------|---------|-----------------|----------------|
| Landmark Absent (Initial) vs Landmark Present (Initial)                             | 0.7355  | 0.7355          | 0.1168         |
| Landmark Present (Initial) vs Landmark Displaced (with respect to burrow; Initial)* | <0.02   | <0.04           | 0.2227         |
| Landmark Absent: Initial vs Final                                                   | 0.9827  | 1               | 0.000048       |
| Landmark Present: Initial vs Final*                                                 | <0.005  | <0.015          | 0.3373         |
| Landmark Displaced: Initial vs Final                                                | 0.7414  | 0.7414          | 0.11234        |

307

308

309 **Table 3: Summary of homogeneity of means statistical tests for path straightness data.** The  
310 comparison in the row without an asterisk was analyzed using a paired T-test (test statistic is t).  
311 Since the “landmark displaced” group did not adhere to the requirements of a T-test, the row  
312 with an asterisk (\*) was analyzed using a non-parametric paired Wilcoxon Signed-Rank Test  
313 (test statistic is V). The straightness of paths from groups within each comparison were  
314 significantly different from one another ( $P < 0.05$ ). The data from this table can be viewed in  
315 Figure 3.

| Experiment                              | P-value | Holm-Bonferroni | Test Statistic |
|-----------------------------------------|---------|-----------------|----------------|
| Landmark Absent vs Landmark Present     | 0.0216  | 0.0432          | 2.64           |
| Landmark Present vs Landmark Displaced* | 0.027   | 0.0432          | 49             |

316

317

318

319 **Materials and Methods:**

320

321 Animal Care

322 Individual *Neogonodactylus oerstedii* collected in the Florida Keys, USA were shipped to  
323 the University of Maryland, Baltimore County (UMBC). Animals were housed individually in 30  
324 parts per thousand (ppt) sea water at room temperature under a 12:12 light:dark cycle. Animals  
325 were fed whiteleg shrimp, *Litopenaeus vannamei*, once per week. Data were collected from 13  
326 individuals (5 male and 8 female). All individuals were between 30 and 50 mm long from the  
327 rostrum to the tip of the telson.

328

329 Experimental Apparatuses

330 Four relatively featureless, circular navigation arenas were constructed from 1.5 m-  
331 diameter plastic wading pools that were filled with pool filter sand and artificial seawater (30  
332 ppt; Fig. 2A). Arenas were placed in a glass-roofed greenhouse on the UMBC campus. The  
333 spectral transmittance of light through the greenhouse glass was nearly constant for all  
334 wavelengths, excluding the deep-UV-wavelength range (280 to 350 nm; Extended Data Fig. 1A).  
335 Celestial polarization information was transmitted through the glass roof of the greenhouse  
336 (Extended Data Fig. 1B-D). Vertical burrows created from 2 cm outer-diameter PVC pipes were  
337 buried in the sand 30 cm from the periphery of the arena so that they were hidden from view  
338 when experimental animals were foraging. Vertical 2 cm diameter, 8 cm high PVC columns with  
339 alternating 1 cm thick black and white horizontal stripes were placed adjacent to the burrows to  
340 function as removable landmarks. Stripe cycle widths of the landmarks were approximately

341 twice the visual resolving limit of *Gonodactylus chiragra* (0.8 cycles/degree [13]), a closely  
342 related mantis shrimp that can be slightly larger than *N. oerstedii*, when viewed from the food  
343 location in the arena (a distance of 70 cm). Trials were recorded from above using C1 Security  
344 Cameras (Foscam Digital Technologies LLC) mounted to tripods placed above the arenas.  
345 During landmark displacement experiments, a thin 11 x 82 cm acrylic track with a movable  
346 platform was placed adjacent to the burrow (Fig. 2B). A landmark identical to the one used in  
347 trials in which the landmark was static, was mounted to the movable platform.

348

#### 349 Experimental Procedures

350 Individual *N. oerstedii* were placed in each arena and were allowed to familiarize  
351 themselves to the arena for 24 hours. During familiarization, the striped landmark was placed  
352 adjacent to the burrow, marking it during the animals' initial explorations of the arena.

353 After familiarization, the landmark was either removed for trials in which the landmark  
354 was absent or left in place for trials in which the landmark was present. Empty *Margarites sp.*  
355 snail shells stuffed with pieces of food (whiteleg shrimp) were placed at one of two locations 50  
356 cm from the periphery of the burrow. Each animal was allowed three successful foraging  
357 excursions (i.e. food placed in the arena was found) before foraging paths were used for  
358 analyses. If an individual did not successfully locate food within one week in the arena, it was  
359 replaced with a new individual.

360 During landmark displacement experiments, the landmark was carefully displaced along  
361 the track to a new location in the arena by the pulling of a thin fishing line tethered to the

362 platform when animals were foraging away from their burrows. The distance from the food  
363 location to the landmark remained relatively constant while the landmark was displaced.

364

### 365 Data and Statistical Analyses

366 Foraging paths to food locations and from them to the burrow were video recorded from  
367 above. In order to differentiate homeward paths from continued arena exploration, paths from the  
368 food locations were considered to be homeward paths when they did not deviate more than 90°  
369 from their initial trajectories for at least one-third of the beeline distance (the length of the  
370 straightest path) from the food location to the burrow. From these homeward paths, search  
371 behaviors were determined to be initiated when an animal turned more than 90° from its initial  
372 trajectory.

373 Paths were traced at a sampling interval of 0.2 seconds using the MTrackJ plugin [28] in  
374 ImageJ v1.49 (Broken Symmetry Software), from which the output is given as Cartesian  
375 coordinates. From these data, the inbound and outbound path lengths, beeline distances from  
376 food to burrow, and inbound and outbound indices of path straightness were calculated, where

$$377 \text{ Path Straightness} = \frac{\text{beeline distance}}{\text{path length}} = \frac{\sqrt{(x_n - x_1)^2 + (y_n - y_1)^2}}{\sum_{k=1}^n \sqrt{(x_{k+1} - x_k)^2 + (y_{k+1} - y_k)^2}}$$

378 n = the last coordinate of the path

379 Additionally, the orientations of homeward paths when animals were both, at one-third of  
380 the beeline distance from the food source to the burrow (at which point the orientation of the  
381 home vector was usually observed) and at the end of the home vector (when search behaviors  
382 were initiated) were recorded using ImageJ.

383 We also measured the orientations of the body axes of all animals in respect to the  
384 landmark while it was displaced. These body axis orientations were sampled at a rate of 0.2  
385 seconds. From these body axis orientations a mean body axis orientation was calculated for each  
386 individual.

387 Data from the “Landmark Absent” group in this study were taken from the “Not  
388 Manipulated” trials of the greenhouse experiments published in Patel and Cronin (2020a) [5].

389 All statistical analyses were run on R (v3.3.1, R Core Development Team 2016) with the  
390 “CircStats”, “circular”, “Hmisc”, and “boot” plugins. Orientation data were analyzed using the  
391 following procedures for circular statistics [29]. All reported mean values for orientation data are  
392 circular means. All circular 95% confidence intervals were calculated by bootstrapping with  
393 replacement over 1000 iterations.

394 As reported in Patel and Cronin (2020a) [5], no significant difference was observed  
395 between homeward orientations of males and females during experiments in the absence of a  
396 landmark ( $P > 0.5$ ; Extended Data Fig. 2)), so data from both sexes were pooled for all  
397 experiments.

398 Rayleigh tests of uniformity were used to determine if homeward paths were oriented  
399 within a group for all trials. Parametric Watson-Williams tests for homogeneity of means were  
400 used to determine if those group orientations were significantly different from one another. The  
401 orientations of groups which did not fit the assumptions of the Watson-Williams test were  
402 instead compared using the non-parametric Watson’s two sample test of homogeneity. These  
403 tests were also used to compare differences between initial homeward path orientations

404 (orientations at one-third the beeline distance from the food to the burrow) and final homeward  
405 path orientations (orientations at the initiation of search behaviors) for each group.

406 Homeward path lengths of trials in which the landmark was present were compared to  
407 those in which the landmark was absent using a paired T-test. A paired Wilcoxon signed-rank  
408 test was used to compare homeward path lengths of trials in which the landmark was static to  
409 those in which the landmark was displaced.

410 Pearson's correlation tests were used for all correlative analyses.

411 Holm-Bonferroni multiple testing corrections were used for all tests when applicable.

412

413

414

415

416

417

418

419

420

421

422

423 **Extended Data Figures:**

424

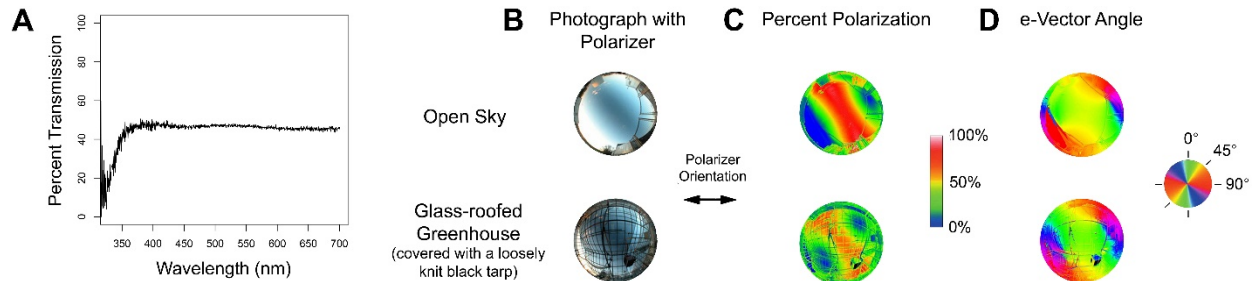

425

426

427 **Extended Data Figure 1. Photonic conditions in the greenhouse where experiments were run.**

428 **(A)** Transmission of irradiance spectra through the glass-roof of the experimental greenhouse

429 near sunset. The spectral transmittance of light through the glass roof of the greenhouse is nearly

430 constant for all wavelengths greater than  $\sim 360$  nm. **(B-D)** Celestial polarization patterns are

431 transmitted through the glass roof of the greenhouse. **(B)** Photographs of the sky at sunset on a

432 day with very few clouds (November 24, 2015) using a fisheye lens and linear polarizer set in the

433 east-west direction (as indicated by the arrow to the right of the photos). Photos were taken

434 inside and outside the glass-roofed greenhouse used for experiments. **(C)** Percent polarization.

435 Warmer regions in the images indicate higher percent polarization and cooler regions indicate

436 lower percent polarization (see key). **(D)** e-Vector angle, indicated by the color corresponding

437 the key to the right of the images. From Patel and Cronin (2020a) [5].

438

439

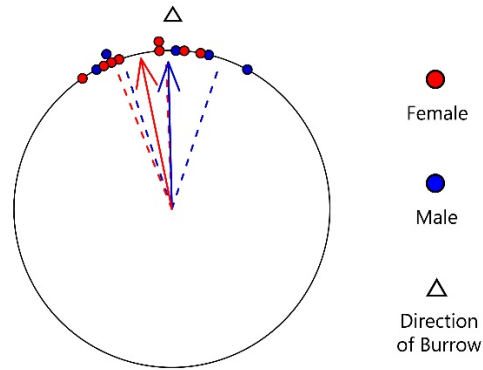

440

441 **Extended Data Figure 2. Male and female *N. oerstedii* orient towards home equally well**

442 **while foraging.** Homeward orientations of male and female individuals during experiments in

443 the greenhouse when animals were not manipulated. Each point along the circumference of the

444 circular plot represents the orientation of the homeward path of one individual with respect to

445 position of the burrow (empty triangle). Blue-filled circles represent males while red-filled

446 circles represent females. Arrows represent mean vectors, where angles of the arrows represent

447 the mean vector angles and arrow lengths represent the strength of orientation in the mean

448 direction ( $\bar{R}$ ). Dashed lines represent 95% confidence intervals. Males (n=5) and females (n=8)

449 both exhibited significant orientations ( $p < 0.01$  for both groups). No significant difference in

450 orientation was observed between males and females ( $p > 0.5$ ). From Patel and Cronin (2020a)

451 [5].

452

453

454

455

456

457

458



459 **Video 1. Foraging behavior of *Neogonodactylus oerstedii* showing homing in the absence of**  
460 **a landmark near the burrow.** Outward path is in blue, home vector path is in red, and search  
461 path is in grey. Filmed at 30 frames per second. Replay speed is indicated in the bottom-right  
462 corner of the video.

463

464 **Video 2. Foraging behavior of *Neogonodactylus oerstedii* showing homing in the presence of**  
465 **a landmark near the burrow.** Outward path is in blue and homeward path is in red. Filmed at  
466 30 frames per second. Replay speed is in real time.

467

468 **Video 3. Foraging behavior of *Neogonodactylus oerstedii* showing homing after a landmark**  
469 **near the burrow had been displaced to a new location in the arena.** During this trial, the  
470 animal homed towards the displaced landmark. Outward path is in blue, home vector path is in  
471 red, and search path is in grey. Filmed at 30 frames per second. Replay speed is indicated in the  
472 bottom-right corner of the video.

473

474 **Video 4. Foraging behavior of *Neogonodactylus oerstedii* showing homing after a landmark**  
475 **near the burrow had been displaced to a new location in the arena.** During this trial, the  
476 animal homed towards its burrow. Outward path is in blue, home vector path is in red, and search  
477 path is in grey. Filmed at 30 frames per second. Replay speed is indicated in the bottom-right  
478 corner of the video.

479

480

481

482 **References:**

- 483 1. Reese, E.S. Orientation behavior of butterflyfishes on coral reefs: spatial learning of  
484 routine specific landmarks and cognitive maps. *Environmental Biology of Fishes*. **25**, 79–  
485 86 (1989).
- 486 2. Dominguez, J.H. & Reaka, M. Temporal activity patterns in reef- dwelling stomatopods:  
487 a test of alternative hypotheses. *Journal of Experimental Marine Biology and Ecology*.  
488 **117**, 47–69 (1988).
- 489 3. Basch, L.V. & Engle, J.M. Aspects of the ecology and behavior of the stomatopod  
490 *Hemisquilla ensigera californiensis* (Gonodactyloidea: Hemisquillidae). *Biology of*  
491 *stomatopods* **3**, 199-212 (1989).
- 492 4. Caldwell, R.L., Roderick, G.K. & Shuster, S.M. Studies of predation by *Gonodactylus*  
493 *bredini*. *Biology of stomatopods* **3**, 117-131 (1989).
- 494 5. Patel, R.N. & Cronin, T.W. Mantis shrimp navigate home using celestial and idiothetic  
495 path integration. *Curr. Biol.* (in press).
- 496 6. Seyfarth, E., Hergenröder, R., Ebbes, H. & Friedrich, G. Idiothetic Orientation of a  
497 Wandering Spider: Compensation of Detours and Estimates of Goal Distance. *Behav.*  
498 *Ecol. Sociobiol.* **11**, 139–148 (1982).
- 499 7. Müller, M. & Wehner, R. Path integration in desert ants, *Cataglyphis fortis*. *Proc. Natl.*  
500 *Acad. Sci. USA* **85**, 5287–5290 (1988).
- 501 8. Seguinot, V., Maurer, R. & Etienne, A.S. Dead reckoning in a small mammal: the  
502 evaluation of distance. *J. Comp. Physiol. A* **173**, 103–113 (1993).
- 503 9. Cheung, A., Zhang, S., Stricker, C. & Srinivasan, M.V. Animal navigation: the difficulty  
504 of moving in a straight line. *Biol. Cyber.* **97**, 47–61 (2007).

- 505 10. Patel R.N. and Cronin, T.W. Path integration error and adaptable search behaviors in a  
506 mantis shrimp. *J. Exp. Biol.* (under review).
- 507 11. Etienne, A. S. Navigation of a small mammal by dead reckoning and local cues. *Curr.*  
508 *Dir. Psychol. Sci.* **1**, 48-52 (1992).
- 509 12. Collett, T. Insect navigation en route to the goal: multiple strategies for the use of  
510 landmarks. *J. Exp. Biol.* **199**, 227–235 (1996).
- 511 13. Akesson S. & Wehner R. 1997. Visual snapshot memory of desert ants, *Cataglyphis*  
512 *fortis*. Proceedings of the Göttingen Neurobiology Conference. 25, 482.
- 513 14. Wehner, R. Desert ant navigation: How miniature brains solve complex tasks. Karl von  
514 Frisch Lecture. *J. Comp. Physiol. A*, **189**, 579–588 (2003).
- 515 15. Marshall N.J. & Land M.F. Some optical features of the eyes of stomatopods. *Journal of*  
516 *Comparative Physiology A*. **173**, 583–594 (1993).
- 517 16. Wystrach A., Mangan M., Webb B. & Mangan M. Optimal cue integration in ants.  
518 *Proceedings of the Royal Society B: Biological Sciences*. **282**, 20151484 (2015).
- 519 17. Cartwright, B.A. & Collet, T.S. Landmark learning in bees: experiments and models. *J.*  
520 *comp. Physiol.* **151**, 521–543 (1983).
- 521 18. O’Keefe, J. & Speakman, A. Single unit activity in the rat hippocampus during a spatial  
522 memory task. *Experimental Brain Research*. **68**, 1–27 (1987).
- 523 19. Cronin, T.W., Bok, M.J., Marshall, N.J. & Caldwell, R.L. Filtering and polychromatic  
524 vision in mantis shrimps: themes in visible and ultraviolet vision. *Phil. Trans. R. Soc. B*  
525 **369**, 20130032 (2014).

- 526 20. Mizunami, M., Weibrecht, J.M. & Strausfeld, N.J. Mushroom bodies of the cockroach:  
527 Their participation in place memory. *Journal of Comparative Neurology* **402**, 520-537  
528 (1998).
- 529 21. Heisenberg, M. Mushroom body memoir: From maps to models. *Nature Reviews*  
530 *Neuroscience* **4**, 266-275 (2003).
- 531 22. Lutz, C.C. & Robinson, G.E. Activity-dependent gene expression in honey bee  
532 mushroom bodies in response to orientation flight. *J. Exp. Biol.* **216**, 2031-2038 (2013).
- 533 23. Stieb, S.M., Muenz, T.S., Wehner, R., Rössler, W. Visual experience and age affect  
534 synaptic organization in the mushroom bodies of the desert ant *Cataglyphis fortis*.  
535 *Developmental Neurobiology.* **70**, 408-423 (2010).
- 536 24. Wolff, G.H., Thoen, H.H., Marshall, N.J., Sayre, M.E. & Strausfeld, N.J. An insect-like  
537 mushroom body in a crustacean brain. *eLife.* 2017;6:e29889 (2017).
- 538 25. Seelig, J.D. & Jayaraman, V. Neural dynamics for landmark orientation and angular path  
539 integration. *Nature.* **251**, 186-191 (2015).
- 540 26. Thoen, H.H., Marshall, N.J., Wolff, G.H., & Strausfeld, N.J. Insect-like organization of  
541 the stomatopod central complex: functional and phylogenetic implications. *Frontiers in*  
542 *Behavioral Neuroscience.* **11**, 1–18 (2017).
- 543 27. Regier J.C., Shultz J.W. & Kambic R.E. Pancrustacean phylogeny: hexapods are  
544 terrestrial crustaceans and maxillopods are not monophyletic. *Proceedings of the Royal*  
545 *Society B.* 272, 395–401 (2005).
- 546 28. Meijering, E., Dzyubachyk, O., & Smal, I. Methods for cell and particle tracking.  
547 *Imaging and Spectroscopic Analysis of Living Cells.* **504**, 183–200 (2012).
- 548 29. Batschelet, E. Circular statistics in biology. *London, UK: Academic Press* (1981).
